# Supplementary material for: Small RNA Profiling of piRNAs in Colorectal Cancer Identifies Consistent Overexpression of piR-24000 That Correlates Clinically with an Aggressive Disease Phenotype
Source: PubMed Central journal article supplement (PMC7016796; doi:10.3390/cancers12010188), 2020-01-12
Supplement: cancers-12-00188-s001.pdf [file cancers-12-00188-s001.pdf]

| Table S1a: Significantly expressed upregulated (fold change $\geq 2$ ) piRNAs in CRC (N=32) |                                |                                    |
|---------------------------------------------------------------------------------------------|--------------------------------|------------------------------------|
| Feature ID                                                                                  | Fold change (TUMOR vs. NORMAL) | <i>P</i> -value (TUMOR vs. NORMAL) |
| piR-hsa-2107                                                                                | 23.12                          | 2.10E-07                           |
| piR-hsa-28160                                                                               | 15.36                          | 1.18E-04                           |
| piR-hsa-27138                                                                               | 13.58                          | 5.99E-03                           |
| piR-hsa-24684                                                                               | 11.58                          | 1.72E-04                           |
| piR-hsa-27621                                                                               | 6.77                           | 1.51E-02                           |
| piR-hsa-1243                                                                                | 4.72                           | 2.96E-02                           |
| piR-hsa-7116                                                                                | 4.65                           | 8.60E-05                           |
| piR-hsa-1282                                                                                | 4.32                           | 1.96E-03                           |
| piR-hsa-26589                                                                               | 3.98                           | 3.32E-03                           |
| piR-hsa-26591                                                                               | 3.98                           | 3.32E-03                           |
| piR-hsa-7193                                                                                | 3.96                           | 5.70E-10                           |
| piR-hsa-29715                                                                               | 3.64                           | 1.78E-03                           |
| piR-hsa-24672                                                                               | 3.62                           | 3.28E-09                           |
| piR-hsa-5937                                                                                | 3.60                           | 4.08E-09                           |
| piR-hsa-5938                                                                                | 3.57                           | 3.92E-09                           |
| piR-hsa-18860                                                                               | 3.22                           | 1.48E-02                           |
| piR-hsa-5934                                                                                | 3.19                           | 4.25E-04                           |
| piR-hsa-9491                                                                                | 3.16                           | 1.72E-03                           |
| piR-hsa-24000                                                                               | 3.16                           | 9.44E-03                           |
| piR-hsa-5936                                                                                | 3.14                           | 1.58E-04                           |
| piR-hsa-27622                                                                               | 2.91                           | 4.83E-07                           |
| piR-hsa-27623                                                                               | 2.91                           | 4.83E-07                           |
| piR-hsa-27007                                                                               | 2.84                           | 1.19E-03                           |
| piR-hsa-23230                                                                               | 2.63                           | 4.66E-04                           |
| piR-hsa-23231                                                                               | 2.63                           | 4.66E-04                           |
| piR-hsa-28190                                                                               | 2.60                           | 1.23E-05                           |
| piR-hsa-28299                                                                               | 2.38                           | 3.18E-02                           |
| piR-hsa-6147                                                                                | 2.33                           | 3.42E-02                           |
| piR-hsa-1593                                                                                | 2.29                           | 3.91E-02                           |
| piR-hsa-32170                                                                               | 2.16                           | 1.57E-02                           |
| piR-hsa-28590                                                                               | 2.08                           | 3.44E-02                           |
| piR-hsa-21126                                                                               | 2.05                           | 2.55E-02                           |

Formatted: Font: Italic

Table S1b: Significantly expressed downregulated (fold change  $\leq 2$ ) piRNAs in CRC (N=111)

| Feature ID    | Fold change (TUMOR vs. NORMAL) | <i>p</i> -value (TUMOR vs. NORMAL) |
|---------------|--------------------------------|------------------------------------|
| piR-hsa-25779 | -95.02                         | 2.53E-02                           |
| piR-hsa-24683 | -87.53                         | 2.32E-04                           |
| piR-hsa-32204 | -73.74                         | 5.42E-05                           |
| piR-hsa-32184 | -41.57                         | 1.20E-03                           |
| piR-hsa-2106  | -40.78                         | 8.41E-05                           |
| piR-hsa-16034 | -32.18                         | 1.38E-03                           |
| piR-hsa-12682 | -28.13                         | 1.67E-02                           |
| piR-hsa-14219 | -26.74                         | 5.05E-03                           |
| piR-hsa-32458 | -25.50                         | 2.66E-03                           |
| piR-hsa-32236 | -25.00                         | 7.72E-03                           |
| piR-hsa-26946 | -22.08                         | 3.02E-04                           |
| piR-hsa-27619 | -21.15                         | 2.75E-03                           |
| piR-hsa-5770  | -21.15                         | 2.75E-03                           |
| piR-hsa-2154  | -20.93                         | 2.76E-05                           |
| piR-hsa-32161 | -20.82                         | 9.90E-03                           |
| piR-hsa-32162 | -17.34                         | 6.74E-03                           |
| piR-hsa-20757 | -14.35                         | 5.87E-03                           |
| piR-hsa-28845 | -13.59                         | 9.33E-08                           |
| piR-hsa-32187 | -13.44                         | 2.41E-02                           |
| piR-hsa-21238 | -12.90                         | 2.37E-03                           |
| piR-hsa-1281  | -12.79                         | 2.30E-02                           |
| piR-hsa-442   | -12.28                         | 1.86E-02                           |
| piR-hsa-6145  | -11.10                         | 1.46E-02                           |
| piR-hsa-15449 | -11.05                         | 3.29E-02                           |
| piR-hsa-26508 | -10.76                         | 2.51E-02                           |
| piR-hsa-1580  | -10.65                         | 2.09E-03                           |
| piR-hsa-18677 | -10.58                         | 1.96E-03                           |
| piR-hsa-31788 | -10.51                         | 1.88E-02                           |
| piR-hsa-28019 | -10.46                         | 5.87E-03                           |
| piR-hsa-17520 | -8.86                          | 1.67E-02                           |
| piR-hsa-18905 | -8.27                          | 4.07E-03                           |
| piR-hsa-16035 | -8.05                          | 4.55E-04                           |
| piR-hsa-11362 | -7.57                          | 3.59E-07                           |
| piR-hsa-27134 | -7.43                          | 3.26E-02                           |
| piR-hsa-26399 | -7.00                          | 1.80E-02                           |
| piR-hsa-23621 | -6.78                          | 1.25E-02                           |
| piR-hsa-4276  | -6.61                          | 1.66E-02                           |
| piR-hsa-1861  | -6.44                          | 2.43E-02                           |
| piR-hsa-13643 | -6.33                          | 2.57E-03                           |

Formatted: Font: Italic

|               |       |          |
|---------------|-------|----------|
| piR-hsa-14647 | -6.15 | 1.11E-10 |
| piR-hsa-27730 | -5.89 | 6.94E-07 |
| piR-hsa-22381 | -5.60 | 6.71E-04 |
| piR-hsa-27729 | -5.37 | 7.99E-06 |
| piR-hsa-25783 | -5.36 | 2.46E-02 |
| piR-hsa-12525 | -5.12 | 3.39E-02 |
| piR-hsa-1710  | -5.04 | 1.56E-08 |
| piR-hsa-28117 | -5.02 | 4.39E-03 |
| piR-hsa-17946 | -4.87 | 1.79E-02 |
| piR-hsa-7646  | -4.86 | 7.48E-03 |
| piR-hsa-11361 | -4.77 | 1.01E-09 |
| piR-hsa-26803 | -4.75 | 4.11E-12 |
| piR-hsa-11360 | -4.71 | 9.93E-10 |
| piR-hsa-1251  | -4.63 | 3.04E-02 |
| piR-hsa-3645  | -4.55 | 3.84E-02 |
| piR-hsa-30636 | -4.49 | 3.00E-02 |
| piR-hsa-28186 | -4.48 | 9.69E-03 |
| piR-hsa-15022 | -4.45 | 5.05E-03 |
| piR-hsa-32299 | -4.36 | 8.43E-04 |
| piR-hsa-8030  | -4.06 | 2.99E-03 |
| piR-hsa-23617 | -4.00 | 1.52E-05 |
| piR-hsa-17560 | -3.98 | 1.55E-06 |
| piR-hsa-27615 | -3.86 | 3.16E-03 |
| piR-hsa-30734 | -3.86 | 2.11E-02 |
| piR-hsa-1043  | -3.84 | 2.84E-04 |
| piR-hsa-22382 | -3.72 | 1.71E-02 |
| piR-hsa-12759 | -3.59 | 1.70E-03 |
| piR-hsa-32492 | -3.58 | 2.81E-02 |
| piR-hsa-3200  | -3.56 | 1.20E-07 |
| piR-hsa-1361  | -3.54 | 8.29E-07 |
| piR-hsa-28521 | -3.46 | 2.39E-02 |
| piR-hsa-1944  | -3.41 | 1.30E-07 |
| piR-hsa-28472 | -3.26 | 4.67E-02 |
| piR-hsa-31237 | -3.25 | 1.00E-02 |
| piR-hsa-317   | -3.23 | 7.94E-06 |
| piR-hsa-28319 | -3.20 | 1.01E-03 |
| piR-hsa-32158 | -3.20 | 3.16E-02 |
| piR-hsa-28403 | -3.12 | 4.81E-02 |
| piR-hsa-28406 | -3.12 | 4.81E-02 |
| piR-hsa-23884 | -3.12 | 4.70E-06 |
| piR-hsa-9361  | -3.07 | 2.12E-02 |
| piR-hsa-820   | -3.06 | 4.42E-03 |
| piR-hsa-28846 | -3.02 | 9.13E-05 |
| piR-hsa-16404 | -2.98 | 8.28E-03 |

|               |       |          |
|---------------|-------|----------|
| piR-hsa-26570 | -2.95 | 1.65E-02 |
| piR-hsa-28646 | -2.93 | 8.35E-03 |
| piR-hsa-3178  | -2.92 | 8.43E-04 |
| piR-hsa-515   | -2.89 | 4.04E-05 |
| piR-hsa-27283 | -2.88 | 6.75E-07 |
| piR-hsa-1847  | -2.82 | 2.42E-02 |
| piR-hsa-5067  | -2.75 | 3.91E-02 |
| piR-hsa-27282 | -2.70 | 9.01E-04 |
| piR-hsa-12454 | -2.68 | 2.54E-02 |
| piR-hsa-21707 | -2.54 | 4.22E-02 |
| piR-hsa-952   | -2.53 | 6.26E-04 |
| piR-hsa-28212 | -2.53 | 8.90E-05 |
| piR-hsa-26524 | -2.51 | 3.42E-03 |
| piR-hsa-26525 | -2.51 | 3.42E-03 |
| piR-hsa-27616 | -2.50 | 2.21E-03 |
| piR-hsa-1742  | -2.48 | 8.85E-04 |
| piR-hsa-619   | -2.48 | 7.11E-03 |
| piR-hsa-26872 | -2.44 | 2.91E-02 |
| piR-hsa-27208 | -2.43 | 3.24E-02 |
| piR-hsa-32585 | -2.39 | 9.74E-03 |
| piR-hsa-29218 | -2.37 | 4.25E-04 |
| piR-hsa-32165 | -2.32 | 3.49E-02 |
| piR-hsa-2138  | -2.27 | 1.71E-02 |
| piR-hsa-12789 | -2.26 | 4.19E-05 |
| piR-hsa-26039 | -2.24 | 3.42E-03 |
| piR-hsa-32159 | -2.19 | 2.90E-03 |
| piR-hsa-28851 | -2.15 | 4.90E-02 |
| piR-hsa-25046 | -2.07 | 2.29E-03 |

**Table S2: Primer sequences used for reverse transcription (RT) and quantitative polymerase chain reaction (QPCR)**

| <b>Gene name</b>                   | <b>Primer sequence (5'-3')</b>   |
|------------------------------------|----------------------------------|
| Oligo dT for reverse transcription | CAGGTCCAGTTTTTTTTTTTTTTTTVN      |
| RNU6B Forward                      | CGCTTCGGCAGCACATATACTA           |
| RNU6B Reverse                      | ACGCTTCACGAATTTGCGT              |
| piR-hsa-24000 Forward              | GCAGCTGCATCCACTGATAGAC           |
| piR-hsa-24000 Reverse              | GGTCCAGTTTTTTTTTTTTTTTATTGTTCAAG |
